# Supplementary material for: Recursive regularization for inferring gene networks from time-course gene expression profiles
Source: PubMed Central journal article supplement (PMC2686685; doi:10.1186/1752-0509-3-41), 2009-04-22

## Additional File 1: Structures of Simulated Scale-Free Networks

**Additional Figure 1** – An example of the simulated network for the setting of  $m = 100$

The solid lines indicate positive coefficients and the dotted lines negative coefficients in the coefficient matrix of the VAR model.

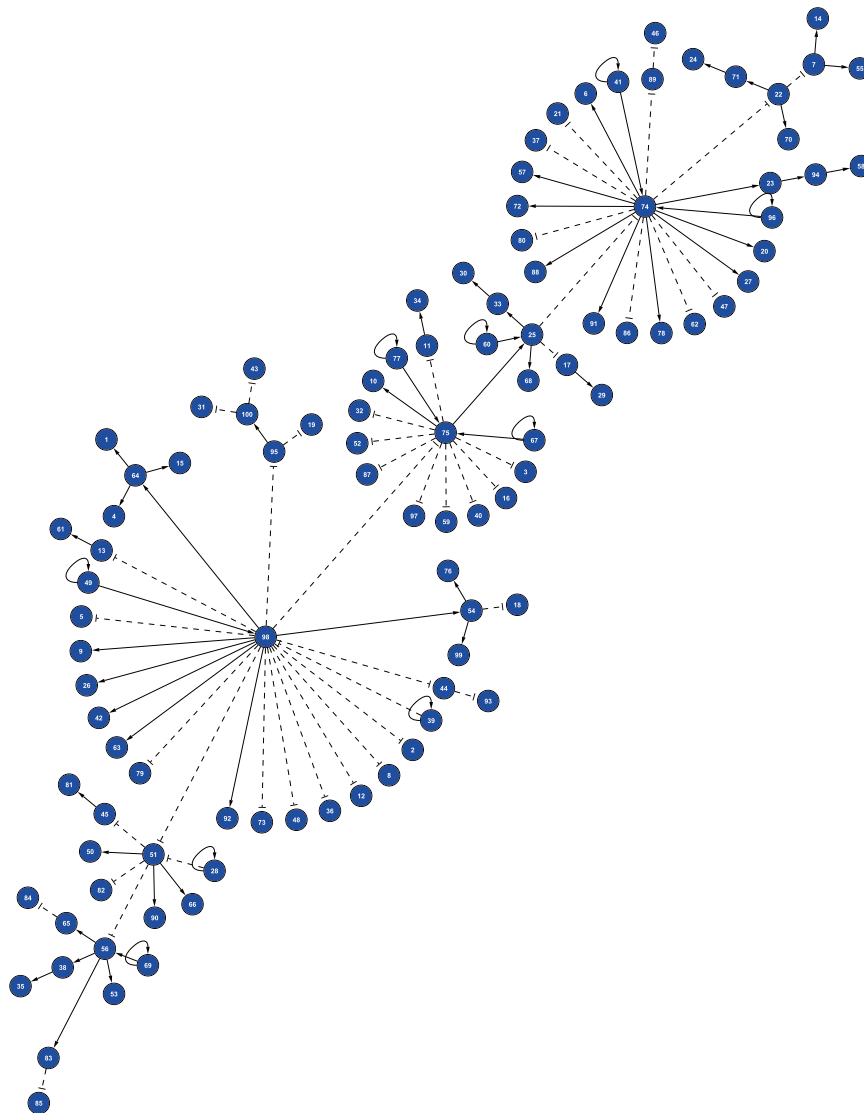

**Additional Figure 2 – An example of the simulated network for the setting of  $m = 200$**

The solid lines indicate positive coefficients and the dotted lines negative coefficients in the coefficient matrix of the VAR model.

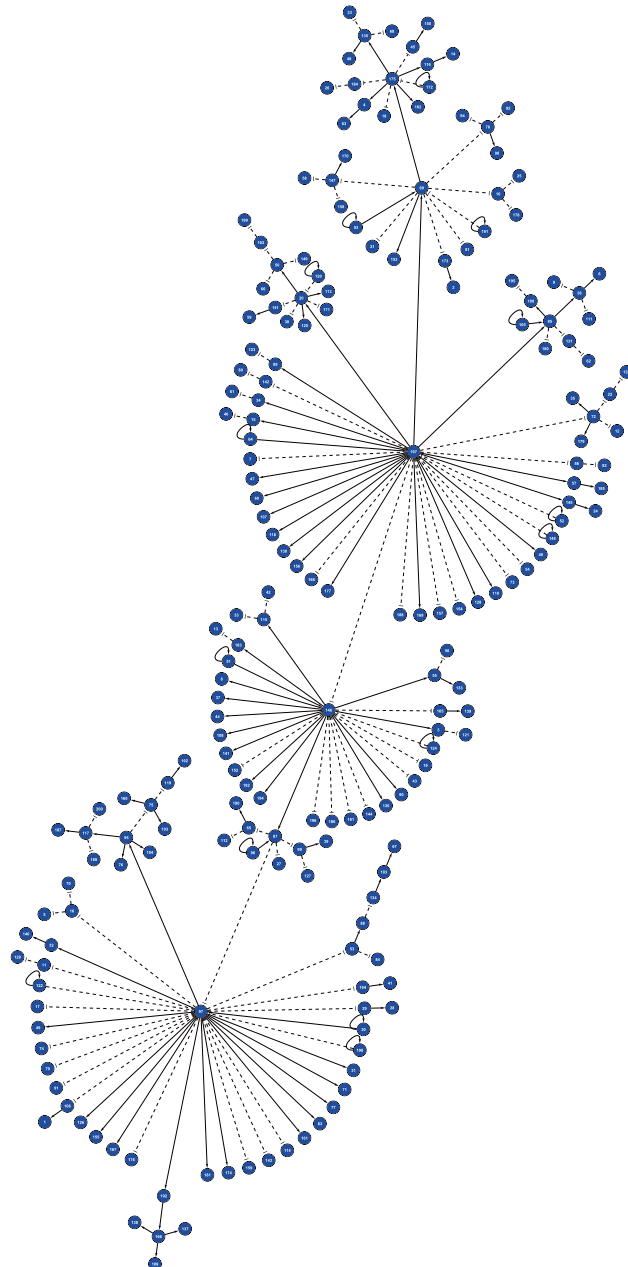

**Additional Figure 3 – An example of the simulated network for the setting of  $m = 500$**

The solid lines indicate positive coefficients and the dotted lines negative coefficients in the coefficient matrix of the VAR model.

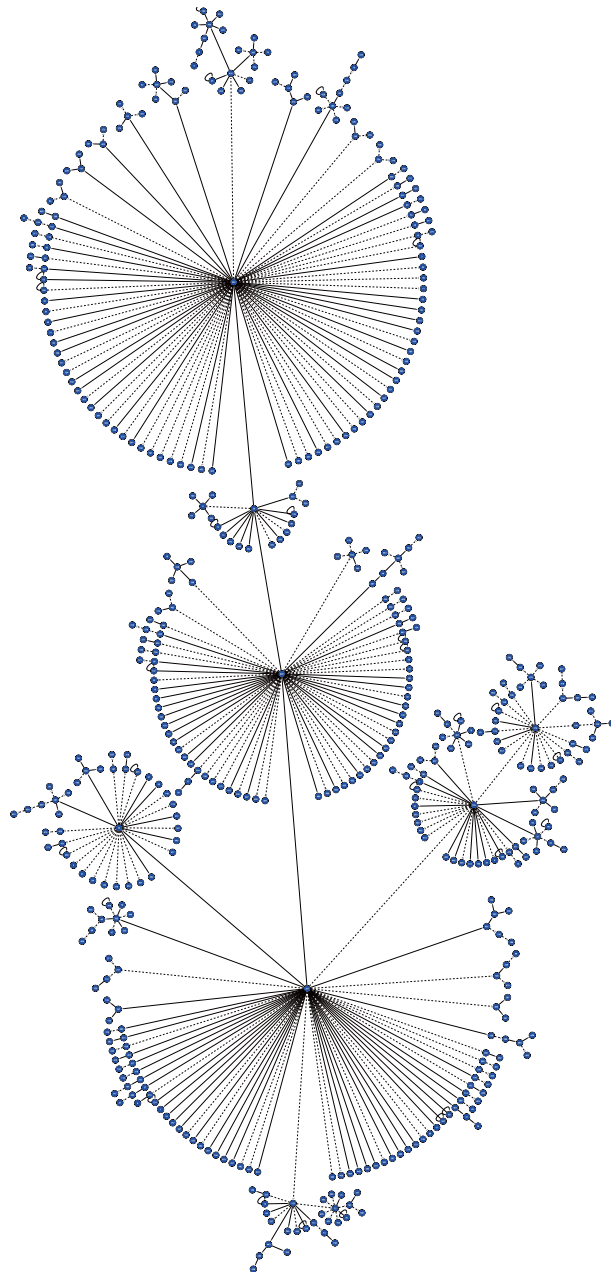

**Additional Figure 4 – An example of the simulated network for the setting of  $m = 1000$**

The solid lines indicate positive coefficients and the dotted lines negative coefficients in the coefficient matrix of the VAR model.

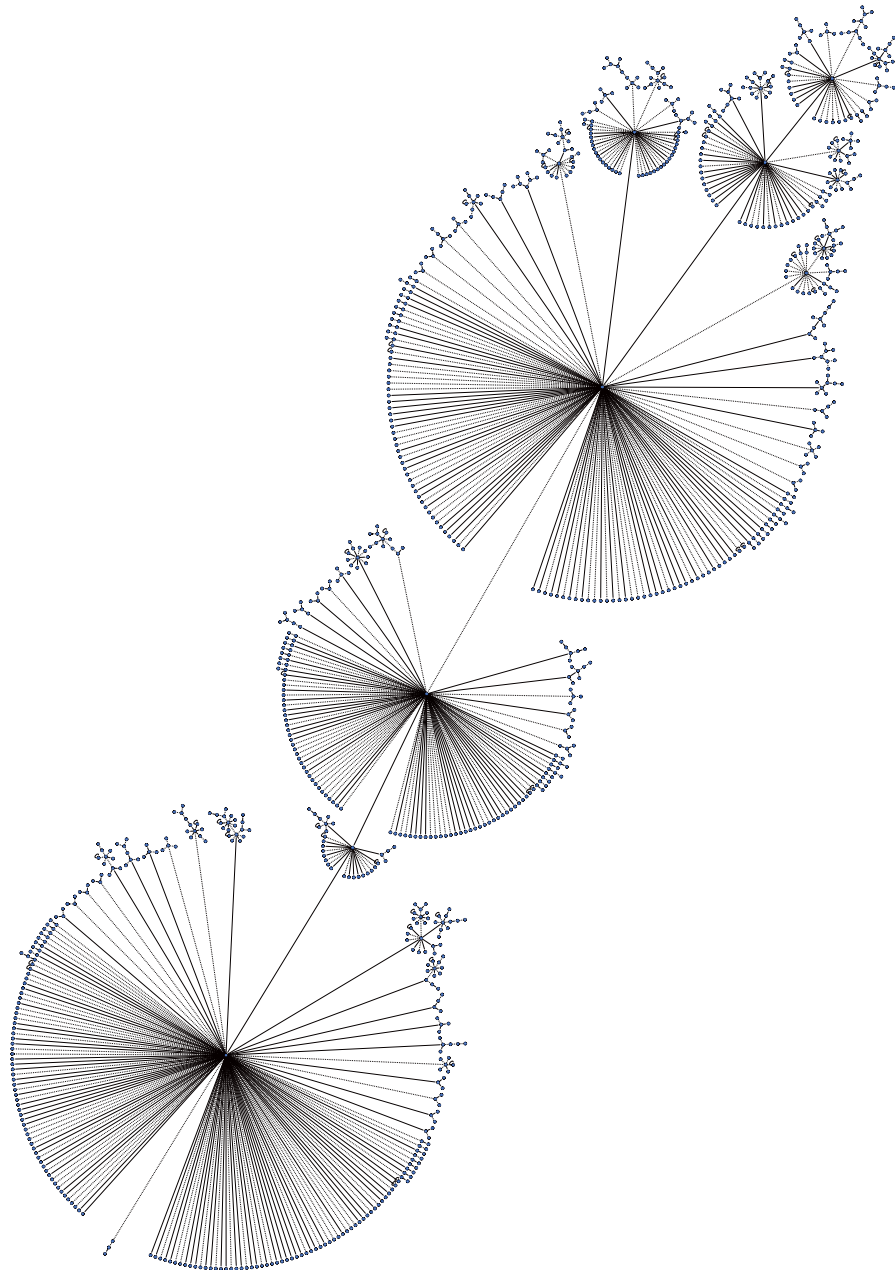

**Additional Figure 5 – An example of the simulated network for the setting of  $m = 2000$**

The solid lines indicate positive coefficients and the dotted lines negative coefficients in the coefficient matrix of the VAR model.

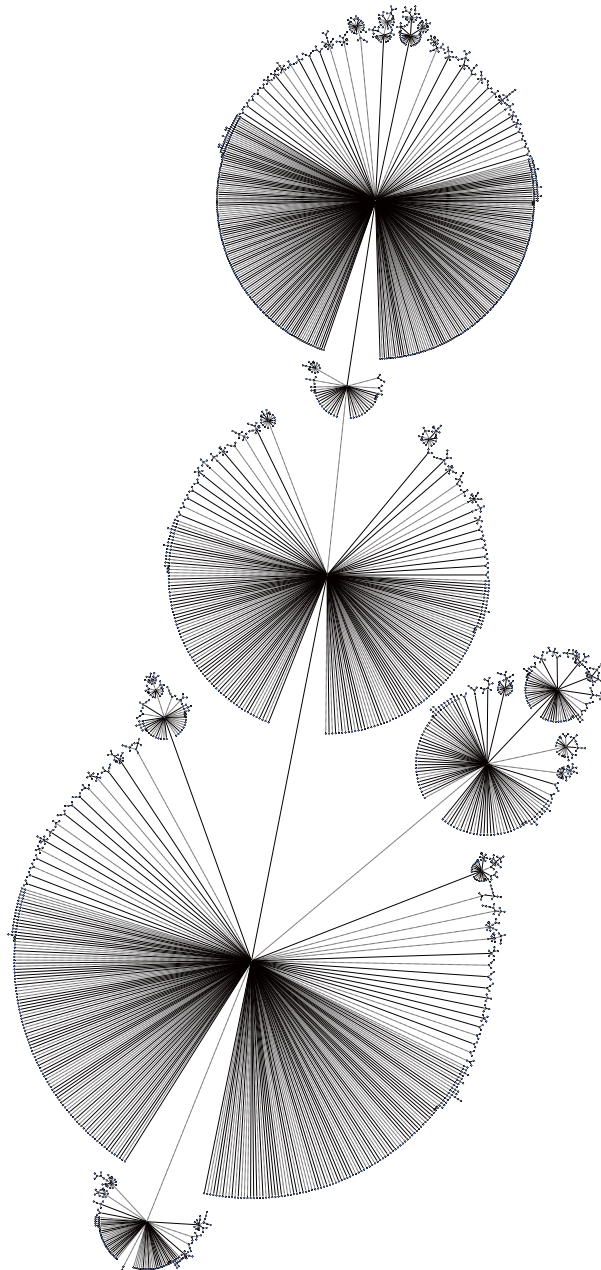

Supplement: 1752-0509-3-41-S1.pdf [file 1752-0509-3-41-S1.pdf]
