# Supplementary material for: Recursive regularization for inferring gene networks from time-course gene expression profiles
Source: PubMed Central journal article supplement (PMC2686685; doi:10.1186/1752-0509-3-41), 2009-04-22

**Additional File 3: In-Degree and Out-Degree Distributions of the EGF- and HRG-induced Gene Networks**

**Additional Figure 7 – In-Degree Distribution of the EGF-Induced Gene Network**

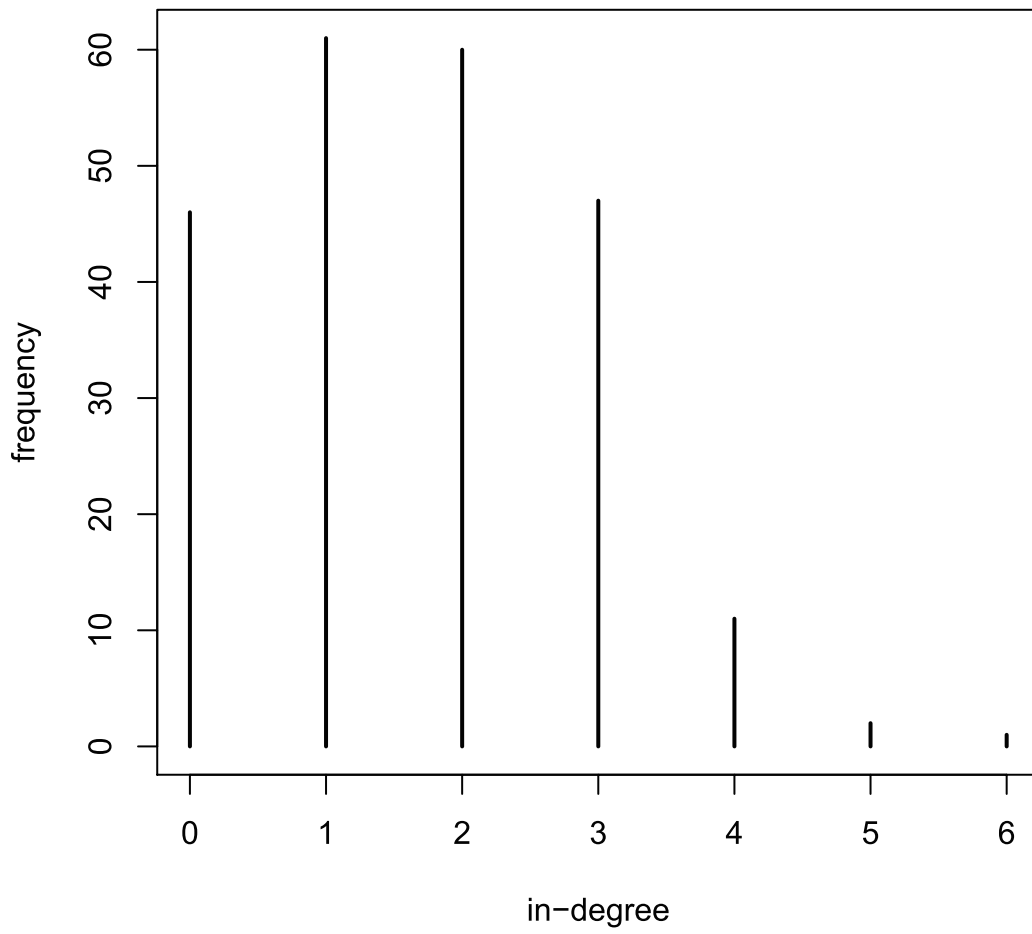

**Additional Figure 8 – Out-Degree Distribution of the EGF-Induced Gene Network**

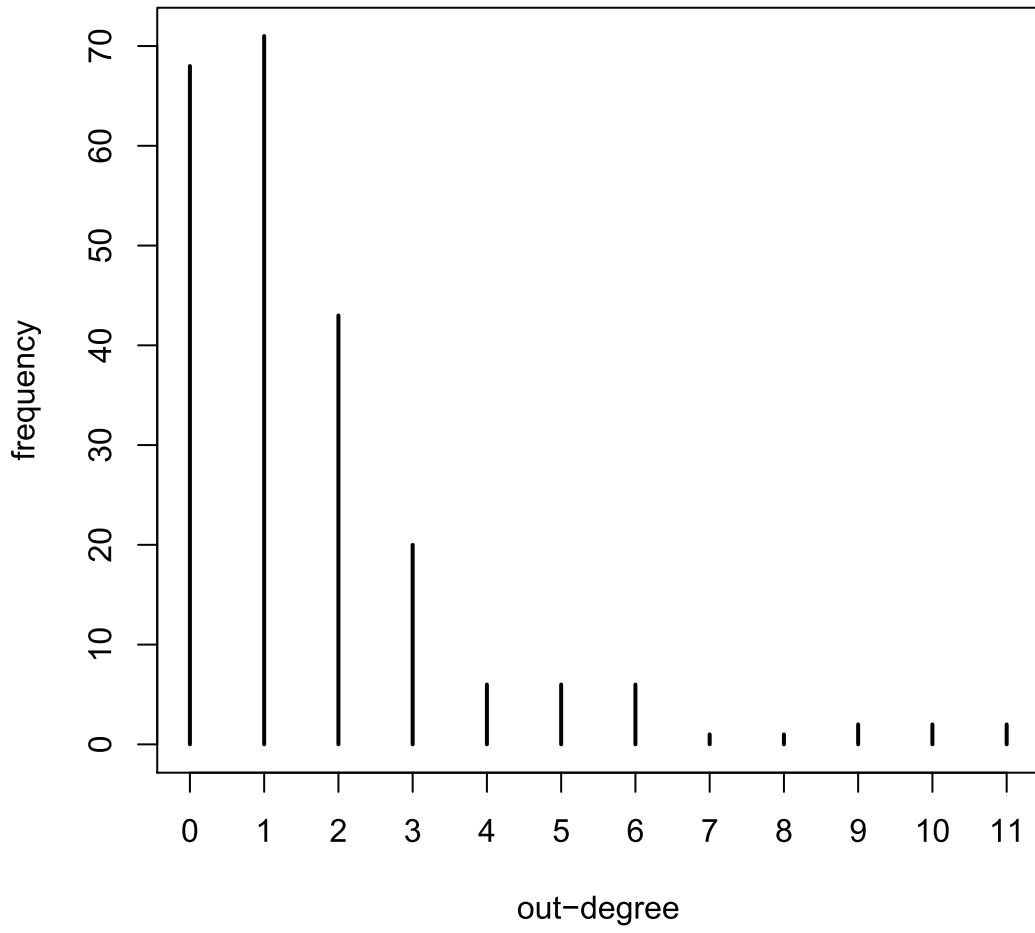

Additional Figure 9 – In-Degree Distribution of the HRG-Induced Gene Network

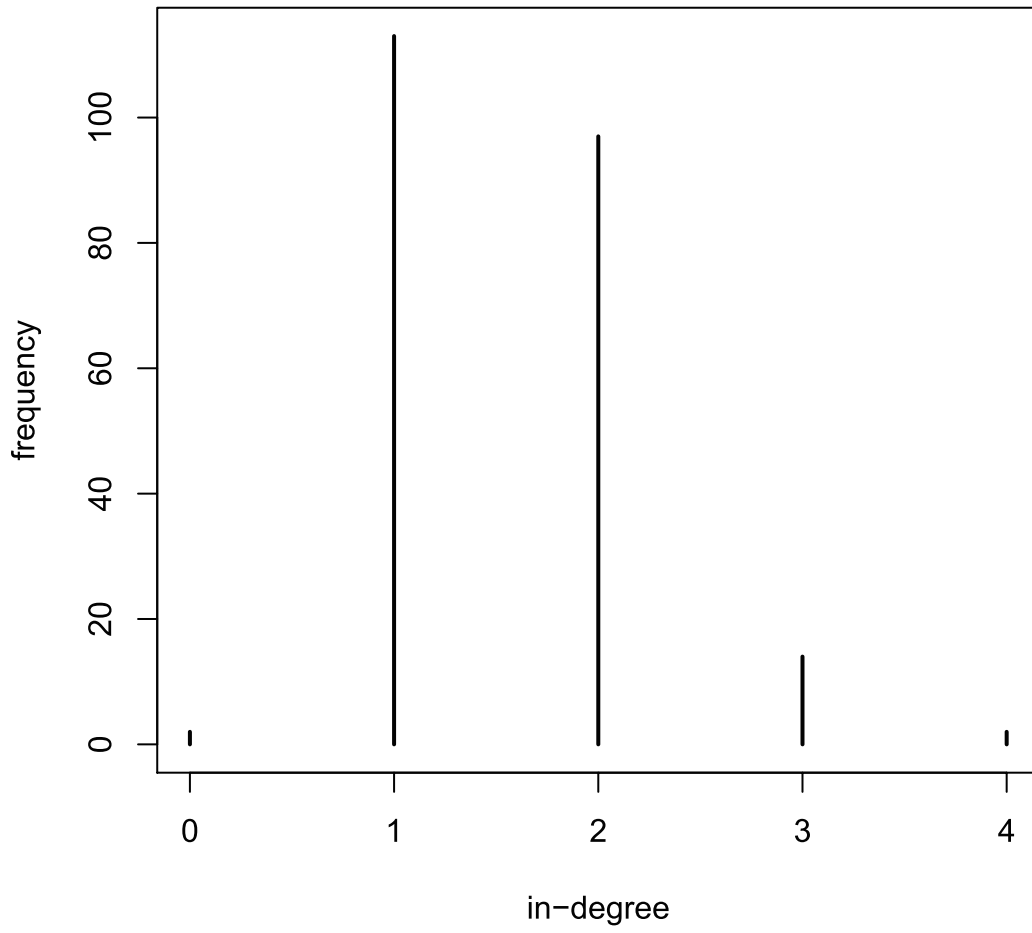

Additional Figure 10 – Out-Degree Distribution of the HRG-Induced Gene Network

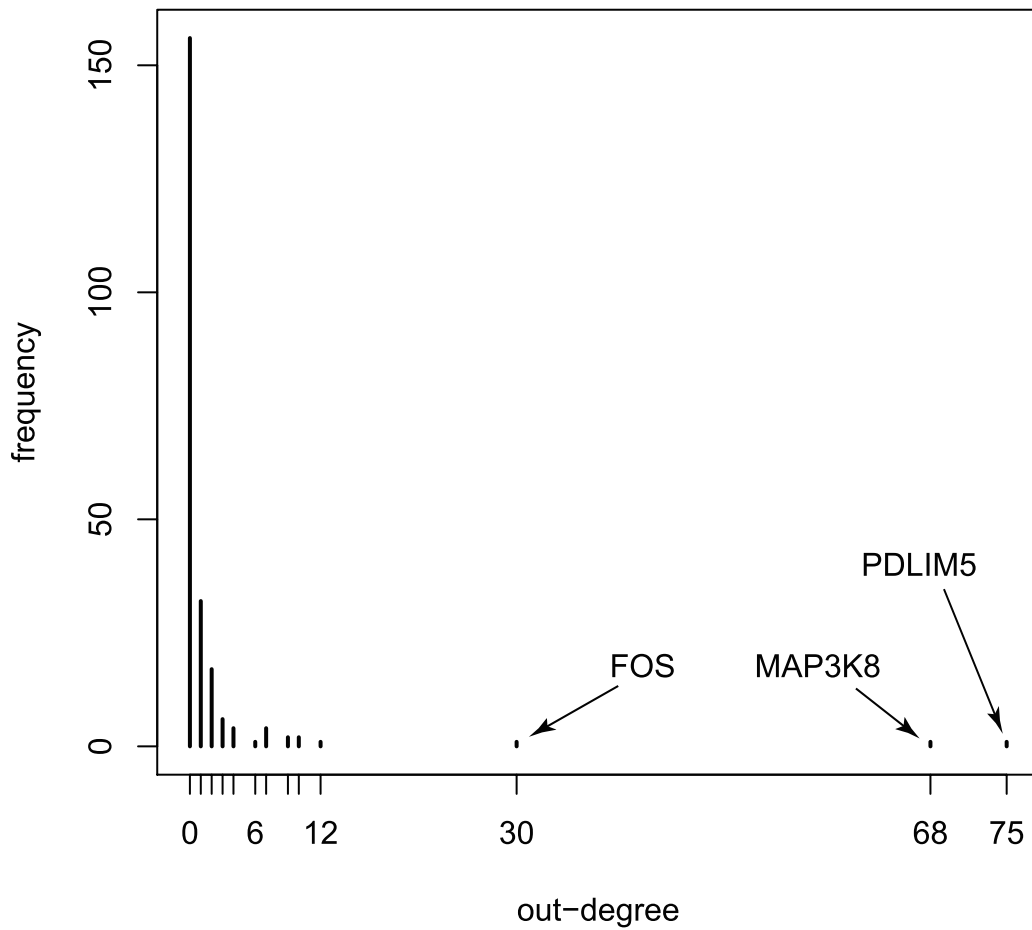

Supplement: 1752-0509-3-41-S3.pdf [file 1752-0509-3-41-S3.pdf]
